# Supplementary material for: Polysome Profiling in Liver Identifies Dynamic Regulation of Endoplasmic Reticulum Translatome by Obesity and Fasting
Source: PLoS Genet. 2012 Aug 23;8(8):e1002902. doi: 10.1371/journal.pgen.1002902 (PMC3426552; doi:10.1371/journal.pgen.1002902)
Supplement: Table S2 — (XLS) [file pgen.1002902.s002.xls]

## Sheet: Sheet1
Supplemental Table S2 Co-regulation of Genes by Fasting and Obesity
Affy ID	Symbol	Description	log2(LF/LNF)	log2(ONF/LNF)
1455579_at	Csn1s2a	casein alpha s2-like A	-4.22318	-1.98816
1430162_at	3830417A13Rik	RIKEN cDNA 3830417A13 gene	-3.86237	-1.09338
1459001_at	Vps33a	vacuolar protein sorting 33A (yeast)	-3.83424	-2.27524
1441000_at	EG237749	predicted gene, EG237749	-3.66073	-3.34447
1443208_at	Gpr137b	G protein-coupled receptor 137B	-3.42329	-2.24793
1449844_at	Slco1a1	solute carrier organic anion transporter family, member 1a1	-3.42048	-6.67105
1439376_x_at		cyclin D binding myb-like transcription factor 1	-3.13233	-2.90994
1457101_at		interleukin 20 receptor, alpha	-3.11306	-1.73777
1426161_at			-2.91011	-2.34356
1453944_at	5430435K18Rik	RIKEN cDNA 5430435K18 gene	-2.86458	-1.32766
1420379_at	Slco1a1	solute carrier organic anion transporter family, member 1a1	-2.8628	-6.47109
1453227_at	Rhobtb3	Rho-related BTB domain containing 3	-2.85771	-1.02216
1431674_at	2610303G11Rik	RIKEN cDNA 2610303G11 gene	-2.75496	-0.983334
1454533_at	9430085L16Rik	RIKEN cDNA 9430085L16 gene	-2.73994	-1.67962
1425522_at	2600011C06Rik	RIKEN cDNA 2600011C06 gene	-2.70352	-0.791295
1447357_at			-2.6692	-1.30291
1443811_at	Prkg1	protein kinase, cGMP-dependent, type I	-2.65479	-2.01039
1418733_at	Twist1	twist gene homolog 1 (Drosophila)	-2.65159	-1.73359
1458556_at	Tnrc6c	trinucleotide repeat containing 6C	-2.60927	-2.86216
1459939_at		predicted gene 4888	-2.50818	-3.49853
1431817_at	Adh6-ps1	alcohol dehydrogenase 6 (class V), pseudogene 1	-2.32568	-2.8554
1421074_at	Cyp7b1	cytochrome P450, family 7, subfamily b, polypeptide 1	-2.30915	-4.92873
1460106_at	Hydin	hydrocephalus inducing	-2.30033	-1.97289
1431044_at	Thoc1	THO complex 1	-2.2766	-4.81762
1436912_at	Cacnb4	calcium channel, voltage-dependent, beta 4 subunit	-2.27554	-2.1103
1446985_at			-2.25301	-1.12597
1423467_at	Ms4a4b	membrane-spanning 4-domains, subfamily A, member 4B	-2.2288	-1.4572
1454097_at	Zcwpw2	zinc finger, CW type with PWWP domain 2	-2.15835	-1.72588
1449109_at	Socs2	suppressor of cytokine signaling 2	-2.10305	-2.24578
1431113_at	Rbm4b	RNA binding motif protein 4B	-2.06543	-0.956065
1429607_at	Trak2	trafficking protein, kinesin binding 2	-2.06442	-1.61727
1423012_at	Syt7	synaptotagmin VII	-2.04437	-1.92211
1427249_x_at	Mup3	major urinary protein 3	-2.04237	-4.11978
1437130_at	EG432879	predicted gene, EG432879	-1.95167	-2.4551
1444170_at	6030446N20Rik	RIKEN cDNA 6030446N20 gene	-1.94708	-2.54124
1447491_at	Lrrc8d	leucine rich repeat containing 8D	-1.91279	-1.3395
1441812_at	Cyp2u1	cytochrome P450, family 2, subfamily u, polypeptide 1	-1.8853	-1.30232
1458870_x_at	Phr1	pam, highwire, rpm 1	-1.87503	-0.853243
1447737_at	Prkra	protein kinase, interferon inducible double stranded RNA dependent activator	-1.85226	-0.354757
1458709_a_at	Atxn7l1	ataxin 7-like 1	-1.84237	-1.2303
1420973_at	Arid5b	AT rich interactive domain 5B (Mrf1 like)	-1.82681	-1.13519
1418872_at	Abcb1b	ATP-binding cassette, sub-family B (MDR/TAP), member 1B	-1.81112	-2.6738
1429772_at	Plxna2	plexin A2	-1.80001	-0.471782
1446431_at	Dnm3	dynamin 3	-1.76607	-1.09764
1421472_at	2900083I11Rik	RIKEN cDNA 2900083I11 gene	-1.75992	-1.21729
1459440_at	Nav3	neuron navigator 3	-1.75777	-1.84927
1445595_at			-1.73835	-3.20412
1440808_x_at	E430002D04Rik	RIKEN cDNA E430002D04 gene	-1.68142	-1.91677
1433898_at	AV025504	expressed sequence AV025504	-1.65739	-1.86115
1458465_at	Pan3	PAN3 polyA specific ribonuclease subunit homolog (S. cerevisiae)	-1.64139	-0.906891
1443678_at	Alms1	Alstrom syndrome 1 homolog (human)	-1.6191	-1.95976
1459246_at	6130401L20Rik	RIKEN cDNA 6130401L20 gene	-1.60063	-1.12942
1440265_at	Jund1	Jun proto-oncogene related gene d1	-1.57066	-0.712271
1459141_at	1810008I18Rik	RIKEN cDNA 1810008I18 gene	-1.55626	-1.24092
1427559_a_at	Atf2	activating transcription factor 2	-1.55151	-0.568964
1451793_at	Klhl24	kelch-like 24 (Drosophila)	-1.53747	-0.489595
1456088_at	Birc4	baculoviral IAP repeat-containing 4	-1.53164	-0.58439
1428012_at	C8a	complement component 8, alpha polypeptide	-1.50053	-1.85475
1425920_at	Cuedc1	CUE domain containing 1	-1.46908	-1.04854
1431027_at	2810455O05Rik	RIKEN cDNA 2810455O05 gene	-1.46313	-0.798647
1439953_at	Pmm2	phosphomannomutase 2	-1.43652	-0.781335
1438261_at	Cited4	Cbp/p300-interacting transactivator, with Glu/Asp-rich carboxy-terminal domain, 4	-1.42263	-0.784327
1447788_s_at	Tspyl3	TSPY-like 3	-1.41075	-0.846565
1445517_at		junction-mediating and regulatory protein	-1.40898	-0.839216
1438584_at	1700014D04Rik	RIKEN cDNA 1700014D04 gene	-1.39141	-1.55101
1435667_at	Rims1	regulating synaptic membrane exocytosis 1	-1.3743	-1.89382
1452570_at	D0Kist5	DNA segment, KIST 5	-1.33951	-0.81708
1438516_at	Rif1	Rap1 interacting factor 1 homolog (yeast)	-1.33315	-0.925047
1454702_at	4930503L19Rik	RIKEN cDNA 4930503L19 gene	-1.31331	-0.977267
1457673_at	6820431F20Rik	RIKEN cDNA 6820431F20 gene	-1.27394	-2.42041
1420522_at	Ccdc50	coiled-coil domain containing 50	-1.26442	-0.534196
1437504_at	Sla2	Src-like-adaptor 2	-1.25966	-1.00933
1422218_at	P2rx7	purinergic receptor P2X, ligand-gated ion channel, 7	-1.2376	-1.86442
1423274_at	Ints6	integrator complex subunit 6	-1.22941	-0.93314
1456441_at	Rbm4b	RNA binding motif protein 4B	-1.22911	-0.720226
1458703_at	Gsr	glutathione reductase 1	-1.20027	-1.12419
1449653_at		nebulin	-1.19902	-0.685246
1438916_x_at	6720401G13Rik	RIKEN cDNA 6720401G13 gene	-1.19101	-1.93209
1440057_at	Hsd17b7	hydroxysteroid (17-beta) dehydrogenase 7	-1.19078	-0.829206
1446862_at		replication factor C (activator 1) 5; similar to replication factor C 5	-1.18355	-1.09377
1454601_at	8030497O21Rik	RIKEN cDNA 8030497O21 gene	-1.17297	-1.1269
1454791_a_at	Rbbp4	retinoblastoma binding protein 4	-1.153	-0.819179
1421468_at	Kcnj3	potassium inwardly-rectifying channel, subfamily J, member 3	-1.15126	-1.10674
1422551_at	Zfp306	zinc finger protein 306	-1.13173	-0.505751
1430066_at	4930589M24Rik	RIKEN cDNA 4930589M24 gene	-1.11704	-1.14572
1445241_at	Rab11fip4	RAB11 family interacting protein 4 (class II)	-1.0964	-0.772644
1434830_at	Mxd1	MAX dimerization protein 1	-1.08514	-0.792682
1440223_at	Rbm6	RNA binding motif protein 6	-1.0844	-0.796701
1430286_s_at	4930402H24Rik	RIKEN cDNA 4930402H24 gene	-1.08024	-0.407699
1420420_at	Hao1	hydroxyacid oxidase 1, liver	-1.07611	-0.696648
1441755_at	Mapk15	mitogen-activated protein kinase 15	-1.0703	-0.940768
1423867_at	Serpina3k	serine (or cysteine) peptidase inhibitor, clade A, member 3K	-1.06056	-0.707744
1453716_at	4930480K23Rik	RIKEN cDNA 4930480K23 gene	-1.04935	-0.615974
1448785_at	Runx1t1	runt-related transcription factor 1; translocated to, 1 (cyclin D-related)	-1.04397	-1.28554
1453465_x_at	4930402H24Rik	RIKEN cDNA 4930402H24 gene	-1.02418	-0.676027
1438703_at	Ankrd26	ankyrin repeat domain 26	-1.01398	-0.379764
1459352_at	2410003P15Rik	RIKEN cDNA 2410003P15 gene	-1.01068	-2.17567
1457034_at	D14Abb1e	DNA segment, Chr 14, Abbott 1 expressed	-1.00495	-0.412661
1441295_at	Lman2l	lectin, mannose-binding 2-like	-0.990437	-0.53566
1440357_at		ENSMUSG00000065564	-0.98347	-1.68305
1460405_at	Arhgef10l	Rho guanine nucleotide exchange factor (GEF) 10-like	-0.979687	-0.531522
1459373_at	Epb4.1	erythrocyte protein band 4.1	-0.959125	-1.3774
1443581_at	St6gal1	beta galactoside alpha 2,6 sialyltransferase 1	-0.958907	-1.14503
1445650_at		hypothetical protein LOC100045489	-0.929691	-2.50025
1450955_s_at	Sort1	sortilin 1	-0.925217	-1.33295
1447004_at	Plcb1	phospholipase C, beta 1	-0.922028	-0.841229
1460602_at	Dlc1	deleted in liver cancer 1	-0.9214	-1.15839
1427290_at	Krt81	keratin 81	-0.91446	-1.18252
1454855_at	Magi2	membrane associated guanylate kinase, WW and PDZ domain containing 2	-0.896045	-1.44947
1422603_at	Rnase4	ribonuclease, RNase A family 4	-0.889021	-1.02656
1435887_at	Serpina11	serine (or cysteine) peptidase inhibitor, clade A (alpha-1 antiproteinase, antitrypsin), member 11	-0.885354	-1.32531
1453286_at	Plxna2	plexin A2	-0.882177	-0.420701
1416962_at	Rcc1	regulator of chromosome condensation 1	-0.876835	-0.727273
1420950_at	Znrf1	zinc and ring finger 1	-0.85046	-0.774147
1443836_x_at	Wdr48	WD repeat domain 48	-0.845969	-0.829052
1420382_at	Apob48r	apolipoprotein B48 receptor	-0.83956	-0.681703
1422850_at	Pabpn1	poly(A) binding protein, nuclear 1	-0.825903	-1.12093
1433814_at	Wnt5b	wingless-related MMTV integration site 5B	-0.822154	-0.344698
1456807_at	Ppp1r3e	protein phosphatase 1, regulatory (inhibitor) subunit 3E	-0.822085	-0.768659
1421331_at	Hs3st3a1	heparan sulfate (glucosamine) 3-O-sulfotransferase 3A1	-0.815808	-0.633949
1436429_at	Zfp606	zinc finger protein 606	-0.815634	-1.03616
1448340_at	Tmem30a	transmembrane protein 30A	-0.815492	-0.797335
1418923_at	Slc17a3	solute carrier family 17 (sodium phosphate), member 3	-0.815282	-0.99632
1418892_at	Rhoj	ras homolog gene family, member J	-0.813475	-0.463637
1453590_at	Arl5b	ADP-ribosylation factor-like 5B	-0.809271	-0.741905
1455166_at	Arl5b	ADP-ribosylation factor-like 5B	-0.805656	-0.426436
1417881_at	Slc39a3	solute carrier family 39 (zinc transporter), member 3	-0.783317	-0.766452
1425512_at	Map2k7	mitogen activated protein kinase kinase 7	-0.777158	-0.5889
1439261_x_at	Mitd1	MIT, microtubule interacting and transport, domain containing 1	-0.772299	-0.929006
1449665_at	4833422M21Rik	RIKEN cDNA 4833422M21 gene	-0.770202	-0.59305
1456500_at	Aph1b	anterior pharynx defective 1b homolog (C. elegans)	-0.768073	-0.596332
1433977_at	Hs3st3b1	heparan sulfate (glucosamine) 3-O-sulfotransferase 3B1	-0.763	-0.6683
1426930_at	Brunol4	bruno-like 4, RNA binding protein (Drosophila)	-0.745259	-1.53987
1453497_a_at	Piga	phosphatidylinositol glycan anchor biosynthesis, class A	-0.740963	-0.819536
1450363_at	Asb7	ankyrin repeat and SOCS box-containing protein 7	-0.732046	-0.549669
1421164_a_at	Arhgef1	Rho guanine nucleotide exchange factor (GEF) 1	-0.722168	-0.125258
1432116_at	1700031F05Rik	RIKEN cDNA 1700031F05 gene	-0.719216	-1.20873
1433668_at	Pnrc1	proline-rich nuclear receptor coactivator 1	-0.715918	-0.567144
1435073_a_at	Armc9	armadillo repeat containing 9	-0.715279	-0.672769
1431879_at	9030417H13Rik	RIKEN cDNA 9030417H13 gene	-0.7103	-0.463635
1436401_at	9330128J19Rik	RIKEN cDNA 9330128J19 gene	-0.695205	-0.864878
1424627_at	Cst12	cystatin 12	-0.690082	-1.22468
1448981_x_at	Tcl1b1	T-cell leukemia/lymphoma 1B, 1	-0.688871	-0.893504
1433851_at	Ppp4r2	protein phosphatase 4, regulatory subunit 2	-0.679823	-0.416789
1454776_at	Ehmt1	euchromatic histone methyltransferase 1	-0.668854	-0.646308
1450232_at	Birc4	baculoviral IAP repeat-containing 4	-0.664632	-1.49708
1425641_at	Aff1	AF4/FMR2 family, member 1	-0.650457	-0.934508
1449115_at	Mtf2	metal response element binding transcription factor 2	-0.645575	-0.487468
1452979_at	2610110G12Rik	RIKEN cDNA 2610110G12 gene	-0.641998	-0.218629
1418586_at	Adcy9	adenylate cyclase 9	-0.637471	-0.454619
1432876_at	4632418H02Rik	RIKEN cDNA 4632418H02 gene	-0.634063	-0.755581
1424833_at	Itpr2	inositol 1,4,5-triphosphate receptor 2	-0.618597	-0.706224
1422085_at	Tbx19	T-box 19	-0.615746	-0.492383
1454871_at	Rbm15b	RNA binding motif protein 15B	-0.615393	-0.707366
1429596_at	Slc7a6os	solute carrier family 7, member 6 opposite strand	-0.612781	-0.500657
1455502_at	Madd	MAP-kinase activating death domain	-0.587374	-0.689092
1453564_a_at	Vps24	vacuolar protein sorting 24 (yeast)	-0.58176	-0.384812
1418720_at	Cops7b	COP9 (constitutive photomorphogenic) homolog, subunit 7b (Arabidopsis thaliana)	-0.576736	-0.802607
1434160_at	Zfp592	zinc finger protein 592	-0.573105	-0.527778
1432114_at	1110035E04Rik	RIKEN cDNA 1110035E04 gene	-0.572357	-0.783265
1425095_at	BC002059	cDNA sequence BC002059	-0.570763	-0.917757
1449267_at	Chid1	chitinase domain containing 1	-0.558925	-0.521175
1428729_at	Krit1	KRIT1, ankyrin repeat containing	-0.554697	-1.04716
1457681_at	2610301F02Rik	RIKEN cDNA 2610301F02 gene	-0.539839	-0.460538
1443698_at	Fbxo39	F-box protein 39	-0.531892	-0.54548
1460478_at	2200002J24Rik	RIKEN cDNA 2200002J24 gene	-0.526838	-0.556494
1437738_at	Atp2c1	ATPase, Ca++-sequestering	-0.520714	-0.326994
1448009_at	Ugcgl1	UDP-glucose ceramide glucosyltransferase-like 1	-0.517903	-0.549952
1427116_at	Setd1a	SET domain containing 1A	-0.503393	-0.478623
1439765_x_at	Krt42	keratin 42	-0.499871	-0.783565
1428353_at	Foxk2	forkhead box K2	-0.499537	-0.410665
1418062_at	Eef1a2	eukaryotic translation elongation factor 1 alpha 2	-0.497216	-0.481454
1428144_at	1200011O22Rik	RIKEN cDNA 1200011O22 gene	-0.484039	-0.760523
1438548_x_at	Rhbdd3	rhomboid domain containing 3	-0.47586	-0.543241
1416387_at	Pip5k2c	phosphatidylinositol-4-phosphate 5-kinase, type II, gamma	-0.459262	-0.387446
1416095_x_at	1110005A23Rik	RIKEN cDNA 1110005A23 gene	-0.450618	-0.43804
1418421_at	Bcl6b	B-cell CLL/lymphoma 6, member B	-0.442998	-0.510426
1433697_at	AV312086	expressed sequence AV312086	-0.440325	-0.369845
1417009_at	C1r	complement component 1, r subcomponent	-0.436208	-1.13172
1451579_at	BC024139	cDNA sequence BC024139	-0.434958	-1.0085
1419036_at	Csnk2a1	casein kinase 2, alpha 1 polypeptide	-0.420445	-0.17944
1437109_s_at	Lsm6	LSM6 homolog, U6 small nuclear RNA associated (S. cerevisiae)	-0.413252	-0.656477
1427057_at	C630002B14Rik	RIKEN cDNA C630002B14 gene	-0.407942	-0.446513
1430375_a_at	Ccl27	chemokine (C-C motif) ligand 27	-0.405634	-0.613367
1448942_at	Gng11	guanine nucleotide binding protein (G protein), gamma 11	-0.402514	-0.538171
1440378_at		SEC11 homolog C (S. cerevisiae)	-0.402245	-1.0067
1417208_at	Amacr	alpha-methylacyl-CoA racemase	-0.401718	-0.768126
1437281_x_at	Xab2	XPA binding protein 2	-0.394239	-0.724612
1436571_at			-0.393667	-0.530433
1426991_at	1810048J11Rik	RIKEN cDNA 1810048J11 gene	-0.377348	-0.829711
1460620_at	Zfp592	zinc finger protein 592	-0.371437	-0.329444
1425448_x_at	Atp6v0b	ATPase, H+ transporting, lysosomal V0 subunit B	-0.368148	-0.348525
1455895_x_at	1110012M11Rik	RIKEN cDNA 1110012M11 gene	-0.366295	-0.443376
1424120_at	Rnf8	ring finger protein 8	-0.363107	-0.481043
1451736_a_at	Map2k7	mitogen activated protein kinase kinase 7	-0.354426	-0.21786
1460164_at	Spin1	spindlin 1	-0.345525	-0.618321
1443528_at	Ttbk1	tau tubulin kinase 1	-0.340349	-1.21814
1418202_a_at	Wiz	widely-interspaced zinc finger motifs	-0.339626	-0.478291
1449183_at	Comt	catechol-O-methyltransferase	-0.338796	-0.481719
1448896_at	Pigf	phosphatidylinositol glycan anchor biosynthesis, class F	-0.336381	-0.49385
1453301_a_at	Alkbh4	alkB, alkylation repair homolog 4 (E. coli)	-0.331723	-0.591028
1417893_at	Sfxn3	sideroflexin 3	-0.330987	-0.449053
1417558_at	Fyn	Fyn proto-oncogene	-0.322154	-0.830486
1424588_at	Srgap3	SLIT-ROBO Rho GTPase activating protein 3	-0.284977	-0.634811
1417505_s_at	Il11ra1	interleukin 11 receptor, alpha chain 1	-0.278526	-1.2101
1455300_at	E130014J05Rik	RIKEN cDNA E130014J05 gene	-0.250446	-0.42379
1433550_at	Chfr	checkpoint with forkhead and ring finger domains	-0.24444	-0.22095
1447571_at	Elk4	ELK4, member of ETS oncogene family	-0.242507	-0.641317
1435100_at	A130042E20Rik	RIKEN cDNA A130042E20 gene	-0.230524	-0.409863
1457487_at			-0.200488	-0.813829
1448609_at	Tst	thiosulfate sulfurtransferase, mitochondrial	-0.176193	-0.417718
1448209_a_at	Slc22a17	solute carrier family 22 (organic cation transporter), member 17	-0.16777	-0.597035
1435995_at	Mrpl22	mitochondrial ribosomal protein L22	-0.104517	-0.255158
1416004_at	Ywhah	tyrosine 3-monooxygenase/tryptophan 5-monooxygenase activation protein, eta polypeptide	0.246457	0.605549
1425780_a_at	Tmem167	transmembrane protein 167	0.285147	0.353611
1418986_a_at	Uxt	ubiquitously expressed transcript	0.287376	0.15102
1427207_s_at	Afg3l2	AFG3(ATPase family gene 3)-like 2 (yeast)	0.291472	0.588671
1455486_at	Pias1	protein inhibitor of activated STAT 1	0.303033	0.476969
1428949_at	Xpot	exportin, tRNA (nuclear export receptor for tRNAs)	0.307255	0.740294
1426236_a_at	Glul	glutamate-ammonia ligase (glutamine synthetase)	0.307787	0.166532
1418622_at	Rab2	RAB2, member RAS oncogene family	0.310341	0.506017
1427000_at	Hnf4a	hepatic nuclear factor 4, alpha	0.330554	0.674118
1448796_s_at	Tbrg4	transforming growth factor beta regulated gene 4	0.33441	0.305028
1416896_at	Rps6ka1	ribosomal protein S6 kinase polypeptide 1	0.358572	0.926815
1452637_a_at	Bola1	bolA-like 1 (E. coli)	0.421869	0.256323
1415800_at	Gja1	gap junction membrane channel protein alpha 1	0.43242	0.903436
1416013_at	Pld3	phospholipase D family, member 3	0.446553	0.38695
1452298_a_at	Myo5b	myosin Vb	0.467323	0.847861
1416472_at	Syap1	synapse associated protein 1	0.469098	0.339196
1422685_at	Exoc4	exocyst complex component 4	0.470787	0.938496
1453149_at	Slc25a32	solute carrier family 25, member 32	0.471006	0.579492
1426884_at	Rmnd5a	required for meiotic nuclear division 5 homolog A (S. cerevisiae)	0.476533	0.625733
1433880_at	Dnajc11	DnaJ (Hsp40) homolog, subfamily C, member 11	0.479879	0.581015
1416195_at	RP23-136K12.4	putative phosphatase	0.481516	0.688506
1448982_at	Klk6	kallikrein related-peptidase 6	0.488209	0.569696
1460732_a_at	Ppl	periplakin	0.504362	0.840522
1431930_x_at	Crls1	cardiolipin synthase 1	0.50873	0.697431
1429585_s_at	Mynn	myoneurin	0.520147	0.146541
1428265_at	Ppp2r1b	protein phosphatase 2 (formerly 2A), regulatory subunit A (PR 65), beta isoform	0.540233	0.712559
1418990_at	Ms4a4d	membrane-spanning 4-domains, subfamily A, member 4D	0.544557	0.862314
1454045_a_at	Pgs1	phosphatidylglycerophosphate synthase 1	0.548362	0.579057
1451638_s_at	Armc1	armadillo repeat containing 1	0.550106	0.322977
1428772_at	Xpot	exportin, tRNA (nuclear export receptor for tRNAs)	0.581302	1.09295
1415760_s_at	Atox1	ATX1 (antioxidant protein 1) homolog 1 (yeast)	0.610722	0.379204
1450016_at	Ccng1	cyclin G1	0.620121	0.608211
1427923_at	Zmpste24	zinc metallopeptidase, STE24 homolog (S. cerevisiae)	0.625383	0.599158
1430614_at	4632415K11Rik	RIKEN cDNA 4632415K11 gene	0.632147	0.564824
1417591_at	Ptges2	prostaglandin E synthase 2	0.633418	0.567551
1452252_at	Utp20	UTP20, small subunit (SSU) processome component, homolog (yeast)	0.654432	0.880798
1443960_at		asparaginase like 1	0.669493	0.725706
1450036_at	Sgk3	serum/glucocorticoid regulated kinase 3	0.679871	0.715168
1424441_at	Slc27a4	solute carrier family 27 (fatty acid transporter), member 4	0.699823	0.684798
1420166_at	Dntt	deoxynucleotidyltransferase, terminal	0.72298	1.69145
1454078_a_at	Gal3st1	galactose-3-O-sulfotransferase 1	0.726289	0.834639
1419239_at	Zfp54	zinc finger protein 54	0.727673	1.07934
1441944_s_at	Gpr135	G protein-coupled receptor 135	0.748409	1.54262
1457248_x_at	Hsd17b7	hydroxysteroid (17-beta) dehydrogenase 7	0.77033	0.529247
1454846_at	Utp15	UTP15, U3 small nucleolar ribonucleoprotein, homolog (yeast)	0.796467	0.966702
1433858_at	Lrrc28	leucine rich repeat containing 28	0.798242	1.20801
1451381_at	1810020D17Rik	RIKEN cDNA 1810020D17 gene	0.805649	0.337877
1440916_at	2510049J12Rik	RIKEN cDNA 2510049J12 gene	0.837951	1.01082
1428678_s_at	Wdr73	WD repeat domain 73	0.856805	0.562381
1456646_at	Pex10	peroxisome biogenesis factor 10	0.866607	0.579614
1416762_at	S100a10	S100 calcium binding protein A10 (calpactin)	0.87293	0.871383
1456642_x_at	S100a10	S100 calcium binding protein A10 (calpactin)	0.89479	0.761764
1435416_x_at	Pigq	phosphatidylinositol glycan anchor biosynthesis, class Q	0.909661	0.432155
1451566_at	Zfp810	zinc finger protein 810	0.910857	0.620729
1418455_at	Copz2	coatomer protein complex, subunit zeta 2	0.96157	0.526061
1438385_s_at	Gpt2	glutamic pyruvate transaminase (alanine aminotransferase) 2	0.963082	0.791797
1451371_at	Mrap	melanocortin 2 receptor accessory protein	0.970878	0.885794
1435217_at	LOC666185	hypothetical protein LOC666185	0.989142	1.07779
1423646_at	Zdhhc3	zinc finger, DHHC domain containing 3	0.998696	0.607104
1427284_a_at	Ttpa	tocopherol (alpha) transfer protein	1.00094	0.424701
1455240_x_at	LOC666185	hypothetical protein LOC666185	1.17723	1.31348
1434542_at	Gpt2	glutamic pyruvate transaminase (alanine aminotransferase) 2	1.20613	1.43052
1448568_a_at	Slc20a1	solute carrier family 20, member 1	1.21792	1.08063
1449057_at	Kel	Kell blood group	1.30368	1.57393
1417986_at	Nrarp	Notch-regulated ankyrin repeat protein	1.3061	1.91522
1460351_at	S100a11	S100 calcium binding protein A11 (calizzarin)	1.31713	2.50623
1424629_at	Brca1	breast cancer 1	1.3607	2.16029
1457335_at		RIKEN cDNA 1700065D16 gene	1.3708	0.633955
1432701_at	2810403G07Rik	RIKEN cDNA 2810403G07 gene	1.43709	1.33264
1447817_at	Hif1an	hypoxia-inducible factor 1, alpha subunit inhibitor	1.52867	1.43241
1418181_at	pPtp4a3	protein tyrosine phosphatase 4a3	1.547	0.821436
1439719_at	E430004N04Rik	RIKEN cDNA E430004N04 gene	1.55378	1.63315
1452106_at	Npnt	nephronectin	1.56563	1.65656
1459740_s_at	Ucp2	uncoupling protein 2 (mitochondrial, proton carrier)	1.59667	1.3206
1457117_at	Nfe2l2	nuclear factor, erythroid derived 2, like 2	1.95397	2.0208
1456197_x_at		adherens junction associated protein 1	2.09954	2.25873
1434777_at	Mycl1	v-myc myelocytomatosis viral oncogene homolog 1, lung carcinoma derived (avian)	2.16836	2.05857
1455786_at	2610036F08Rik	RIKEN cDNA 2610036F08 gene	2.17941	1.81323
1442533_at	Nr3c2	nuclear receptor subfamily 3, group C, member 2	2.21991	1.82899
1422140_at	Csprs	component of Sp100-rs	2.55262	2.54091
1418618_at	En1	engrailed 1	2.69779	2.90689
1426013_s_at	Plekha4	pleckstrin homology domain containing, family A (phosphoinositide binding specific) member 4	2.78881	2.50828
1432427_at	Ndufb4	NADH dehydrogenase (ubiquinone) 1 beta subcomplex 4	3.57032	1.82185
LF:lean fasted, LNF:lean non-fasted, ONF: obese non-fasted
